# Supplementary material
Source: HighWire-hosted journal article supplement (https://ajnr-sso.highwirestaging.com/highwire/filestream/104473/field_highwire_adjunct_files/0/0183.pdf)
Supplement: 0183.pdf [file 0183.pdf]

|                                     | N           | Positive  | Indeterminate |           |           | Negative   | Positive + TP     | Negative + FP       |
|-------------------------------------|-------------|-----------|---------------|-----------|-----------|------------|-------------------|---------------------|
|                                     |             |           | Total         | TP        | FP        |            |                   |                     |
| <b>Entire dataset</b>               | <b>1136</b> | <b>46</b> | <b>125</b>    | <b>40</b> | <b>85</b> | <b>965</b> | <b>86 (7.6%)</b>  | <b>1050 (92.4%)</b> |
| <b>eDenver+</b>                     | <b>613</b>  | <b>42</b> | <b>90</b>     | <b>35</b> | <b>55</b> | <b>481</b> | <b>77 (12.6%)</b> | <b>536 (87.4%)</b>  |
| GLF+                                | 67          | 4         | 7             | 4         | 3         | 56         | 8 (11.9%)         | 59 (88.1%)          |
| BA+                                 | 37          | 0         | 2             | 1         | 1         | 35         | 1 (2.7%)          | 36 (97.3%)          |
| MVC+                                | 240         | 27        | 41            | 17        | 24        | 172        | 44 (18.3%)        | 196 (81.7%)         |
| <b>eDenver-</b>                     | <b>523</b>  | <b>4</b>  | <b>35</b>     | <b>5</b>  | <b>30</b> | <b>484</b> | <b>9 (1.7%)</b>   | <b>514 (98.3%)</b>  |
| GLF-                                | 82          | 0         | 7             | 0         | 7         | 75         | 0 (0%)            | 82 (100%)           |
| BA-                                 | 56          | 0         | 3             | 1*        | 2         | 53         | 1 (1.8%)          | 55 (98.2%)          |
| MVC-                                | 203         | 1         | 11            | 3         | 8         | 191        | 4 (2.0%)          | 199 (98.0%)         |
| MVC <sub>low</sub>                  | 66          | 0         | 3             | 0         | 3         | 63         | 0 (0%)            | 66 (100%)           |
| <b>GLF-, BA-, MVC<sub>low</sub></b> | <b>204</b>  | <b>0</b>  | <b>13</b>     | <b>1*</b> | <b>12</b> | <b>191</b> | <b>1 (0.5%)</b>   | <b>203 (99.5%)</b>  |

**Online supplemental Data.** Numbers of positive, indeterminate, and negative CTA

studies for the entire dataset, the groups meeting and not meeting expanded Denver criteria (eDenver+ and eDenver-, respectively), as well as subgroup analysis of the ground-level fall groups meeting and not meeting expanded Denver criteria (GLF+ and GLF-, respectively), the blunt assault groups meeting and not meeting expanded Denver criteria (BA+ and BA-, respectively), the motor vehicle collision groups meeting and not meeting expanded Denver criteria (MVC+ and MVC-, respectively), and the motor vehicle collision group not meeting expanded Denver criteria or any high risk trauma mechanism characteristics (MVC<sub>low</sub>). TP = true positive, FP = false positive. \*The single positive study in the BA- group was a questionable injury that did not receive further treatment or have any known negative outcomes.
